# Supplementary material
Source: PubMed Central journal article supplement (PMC7217419)
Supplement: ASN.2019090959SupplementaryData.pdf [file ASN.2019090959SupplementaryData.pdf]

**Tubular STAT3 limits renal inflammation in autosomal dominant polycystic kidney disease.**

## **Supplementary Material**

### **Table of contents**

**Supplementary Figure 1: Correlation between STAT3 phosphorylation and *Soes3* and *Lcn2* mRNA in kidneys from 13 old control, *iPkd1*<sup>ΔTub</sup> and *iPkd1*<sup>ΔTub</sup>; *iCcl2*<sup>ΔTub</sup> mice.**

**Supplementary Figure 2: Primary cilia promote STAT3 phosphorylation in tubular cells *in vitro*.**

**Supplementary Figure 3: STAT3 ablation does not reduce cell proliferation or increased apoptosis.**

**Supplementary Figure 4: STAT3 disruption has a selective impact on renal inflammation in ADPKD.**

**Supplementary Table 1: Primers used for qRT-PCR.**

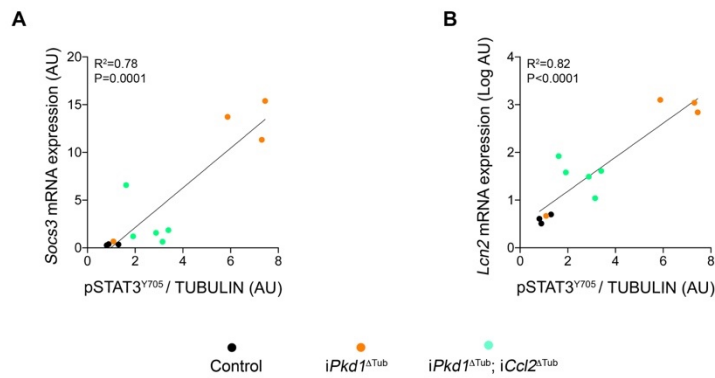

**Supplementary Figure 1: Correlation between STAT3 phosphorylation and *Socs3* and *Lcn2* mRNA in kidneys from 13 old control, *iPkd1*<sup>ΔTub</sup> and *iPkd1*<sup>ΔTub</sup>; *iCcl2*<sup>ΔTub</sup> mice. (A- B) Correlation between pSTAT3<sup>Y705</sup> amount and the expression of *Socs3* (A) and *Lcn2* (B) mRNA in kidneys from 13 weeks old control, *iPkd1*<sup>ΔTub</sup> and *iPkd1*<sup>ΔTub</sup>; *iCcl2*<sup>ΔTub</sup> mice. AU: arbitrary units.**

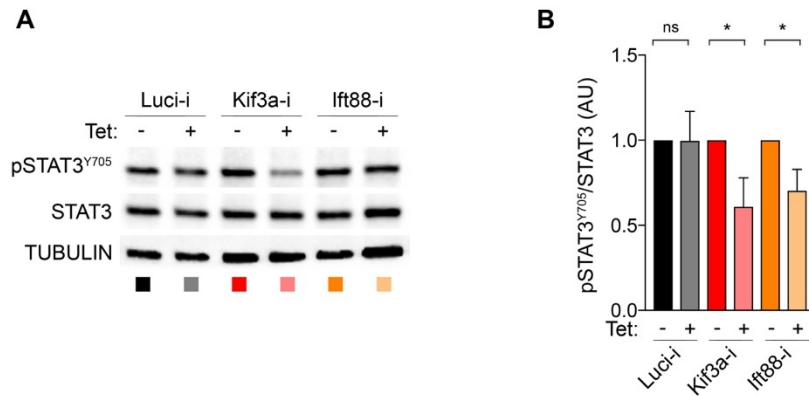

**Supplementary Figure 1: Primary cilia promote STAT3 phosphorylation in tubular cells *in vitro*.** (A, B) Representative western blot (A) and quantification (B) of STAT3 phosphorylation in whole cell lysates from MDCK cells expressing inducible shRNA against *Kif3a* (Kif3a-i), *Ift88* (Ift88-i) or the non-relevant control luciferase (Luci-i) after 10 days of tetracyclin treatment (+ Tet). Bars are mean  $\pm$  SEM of 4 independent experiments. Paired *t* test, ns: not significant, \**P*<0.05.

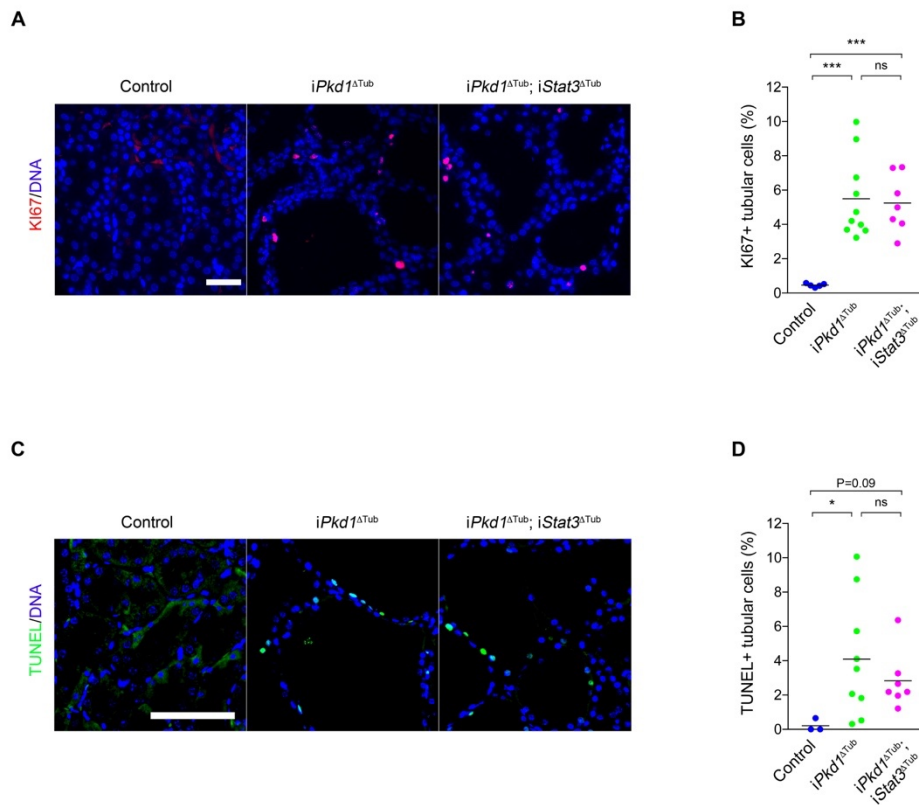

**Supplementary Figure 3: STAT3 ablation does not reduce cell proliferation or increased apoptosis. (A-B)** Representative image (A) and quantification (B) of KI67 staining of kidneys from 18 weeks old *iPkd1<sup>ΔTub</sup>* and *iPkd1<sup>ΔTub</sup>; iStat3<sup>ΔTub</sup>* mice. **(C-D)** Representative image (C) and quantification (D) of TUNEL staining of kidneys from 18 weeks old *iPkd1<sup>ΔTub</sup>* and *iPkd1<sup>ΔTub</sup>; iStat3<sup>ΔTub</sup>* mice. Each dot represents one individual mouse. One-way ANOVA followed by Tukey-Kramer test, ns: not significant, \* $P < 0.05$ , \*\*\* $P < 0.001$ . Scale Bars 50 $\mu$ m.

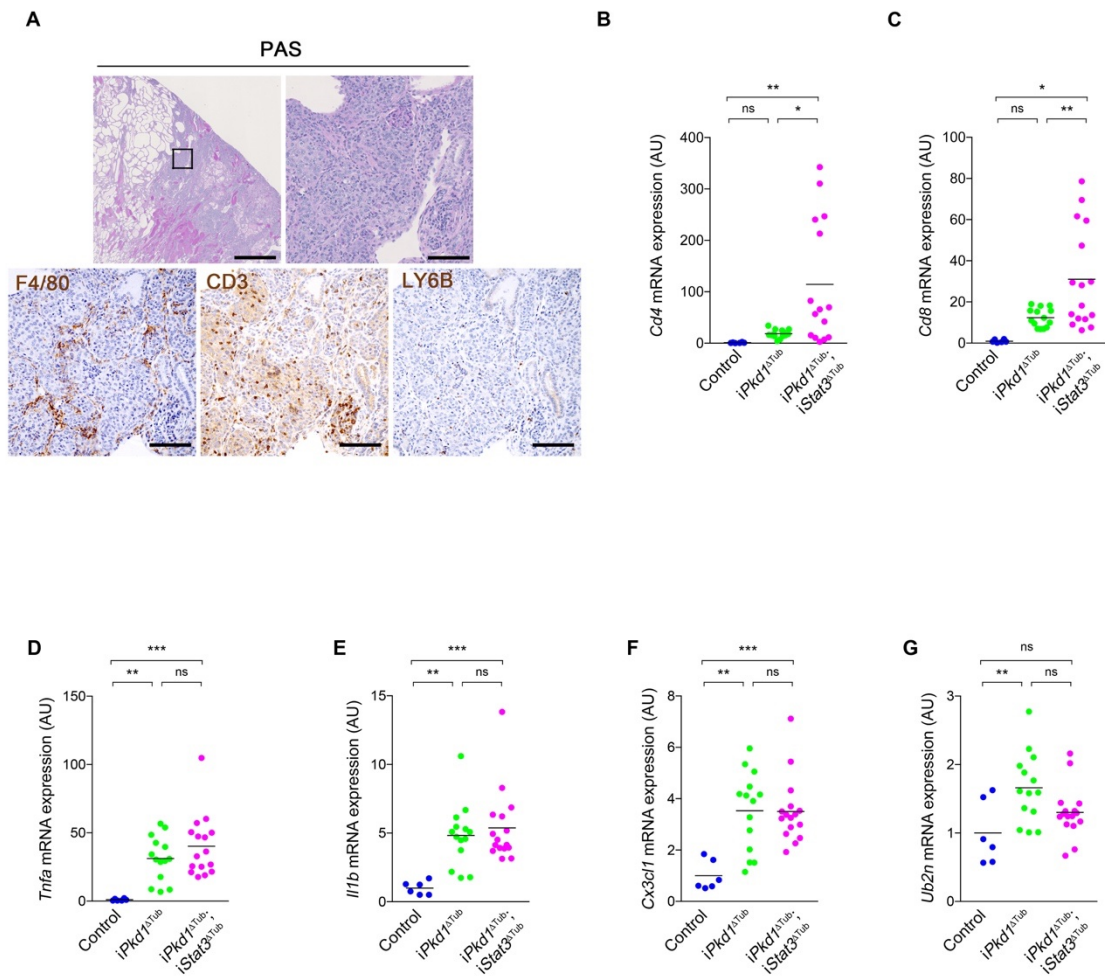

**Supplementary Figure 4: STAT3 disruption has a selective impact on renal inflammation in ADPKD.** (A) Representative images of PAS, F4/80, CD3 and LY6B immunostaining of kidney sections from 18 weeks old  $iPkd1^{\Delta Tub}$ ;  $iStat3^{\Delta Tub}$ . Scale bars: 1mm for upper left panel and 0.1mm for other panels. (B-G) Quantification of *Cd4* (B), *Cd8* (C), *Tnfa* (D), *Il1b* (E), *Cx3cl1* (F), and *Ub2n* (G) mRNA abundance in kidneys from control,  $iPkd1^{\Delta Tub}$  and  $iPkd1^{\Delta Tub}; iStat3^{\Delta Tub}$  mice at 18 weeks. Each dot represents one individual mouse. One-way ANOVA followed by Tukey-Kramer test, ns: not significant, \* $P < 0.05$ , \*\* $P < 0.01$ , \*\*\* $P < 0.001$ .

**Supplementary Table 1: primers used for RT-qPCR**

|                                 | Forward Primer (5' to 3') | Reverse Primer (5' to 3') |
|---------------------------------|---------------------------|---------------------------|
| Primers for <i>Canis Lupus</i>  |                           |                           |
| <i>Ccl2</i>                     | CTGCTGCTATACACTCACCAATA   | TCAGCACAGATCTCCTTGTTTAG   |
| <i>Gapdh</i>                    | CATGTTTGTGATGGGCGTGAACCA  | TTTGGCTAGAGGAGCCAAGCAGTT  |
| Primers for <i>Mus Musculus</i> |                           |                           |
| <i>Ccl2</i>                     | AGTAGGCTGGAGAGCTACAA      | GTATGTCTGGACCCATTCCTTC    |
| <i>Ccl5</i>                     | GCCCACGTCAAGGAGTATTT      | CTTGAACCCACTTCTTCTCTGG    |
| <i>Ccr2</i>                     | GCTCTACATTCACTCCTTCCAC    | ACCACTGTCTTTGAGGCTTG      |
| <i>Cd3e</i>                     | AAGCCTGTGACCCGAGGAA       | TGCGGATGGGCTCATAGTCT      |
| <i>Cd4</i>                      | CAGCATGGCAAAGGTGTATT      | TGATGATGAGAGGAAACGATCC    |
| <i>Cd8a</i>                     | CAGAGACCAGAAGATTGTCG      | TGATCAAGGACAGCAGAAGG      |
| <i>Cx3cl1</i>                   | GGAAAGAAACGTGGTCCAGA      | GGAAAGAAACGTGGTCCAGA      |
| <i>Cxcl10</i>                   | GGATGGCTGTCCTAGCTCTG      | TGAGCTAGGGAGGACAAGGA      |
| <i>Gapdh</i>                    | TGCACCACCAACTGCTTAG       | TGGATGCAGGGATGATGTT       |
| <i>Haver1</i>                   | GAGAGTGACAGTGGTCTGTATTG   | CCTTGTAGTTGTGGGTCTTCTT    |
| <i>Hprt</i>                     | GGCCAGACTTTGTTGGATTTG     | CGCTCATCTTAGGCTTTGTATTTG  |
| <i>Il1</i>                      | GAGGACATGAGCACCTTCTTT     | GCCTGTAGTGCAGTTGTCTAA     |
| <i>Il6</i>                      | CTCTGGGAAATCGTGGAAATG     | AAGTGCATCATGGTTGTTCAT     |
| <i>Lcn2</i>                     | GGACCAGGGCTGTCTGCTACT     | GGTGGCCACTTGCACATTGT      |
| <i>Ppia</i>                     | GGCTATAAGGGTTCCTCCTTTC    | TTTCTCTCCGTAGATGGACCT     |
| <i>Rpl13</i>                    | CTCATCCTGTTCCCCAGGAA      | GGGTGGCCAGCTTAAGTTCTT     |
| <i>Socs3</i>                    | CCACCCTCCAGCATCTTTGT      | CAGGCAGCTGGGTCACCTTC      |
| <i>Tnfa</i>                     | ATTCGAGTGACAAGCCTGTAG     | TGAAGAGAACCTGGGAGT        |
| <i>Ub2n</i>                     | CAGAACCAGTTCCTGGCATT      | CAGTGCTGGGGACCACTTAT      |
